# Supplementary material for: Local structural distortions and thermochromic properties of Cs2NaFeCl6 halide double perovskite
Source: Royal Society of Chemistry journal article supplement (doi:10.1039/d4ta05643d), 2024-01-01
Supplement: d4ta05643d1.pdf [file d4ta05643d1.pdf]

**Supplementary Information**

**Local Structural Distortions and**

**Thermochromic Properties in  $\text{Cs}_2\text{NaFeCl}_6$**

**Halide Double Perovskite**

Bikash Ranjan Sahoo,<sup>a</sup> Venkatesha R. Hathwar,<sup>b</sup> U.P. Deshpande,<sup>c</sup> and  
Preeti A. Bhobe<sup>\*,a</sup>

<sup>a</sup>*Department of Physics, Indian Institute of Technology Indore, Khandwa Road,  
Simrol, Indore 453552, India*

<sup>b</sup>*Department of Physics, Goa University, Taleigao Plateau, Goa, 403206,  
India*

<sup>c</sup>*UGC-DAE Consortium for Scientific Research, University Campus, Khandwa  
Road, Indore, 452017, India*

\*E-mail: [pbhobe@iiti.ac.in](mailto:pbhobe@iiti.ac.in)

## S1: Shifting of (220) peak position in temperature dependent XRD spectra

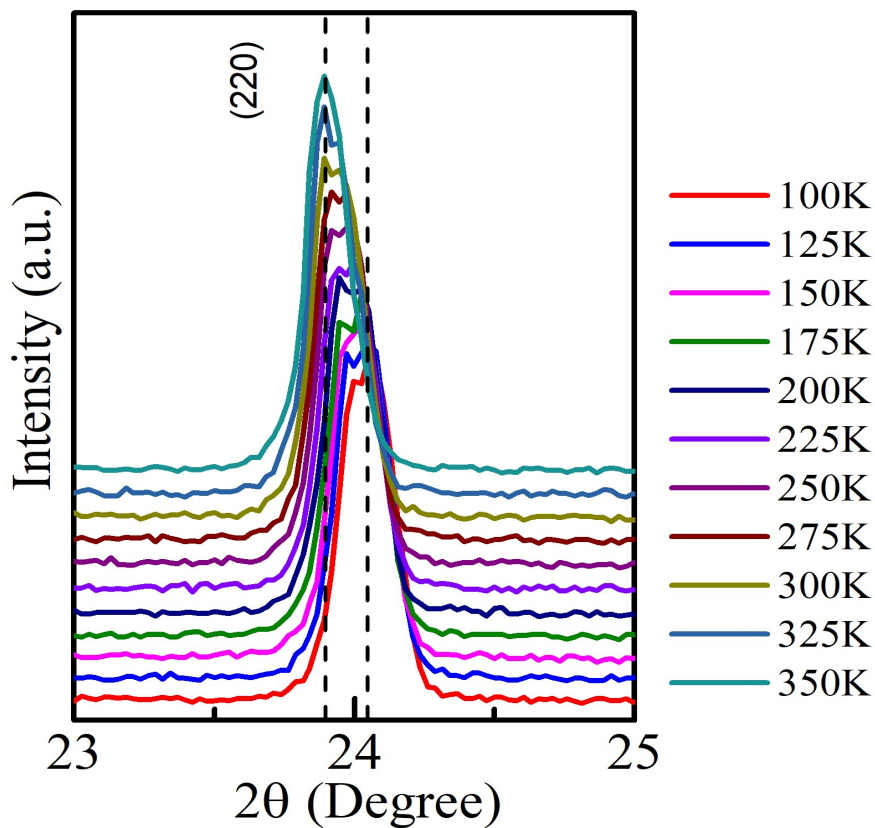

**Fig. S1.** Shifting of (220) peak with temperature starting from 100K to 350K. The apparent peak-splitting seen here is an artifact from the  $K\alpha_1$  and  $K\alpha_2$  X-ray wavelengths of Cu source, used for recording the XRD profile.

**S2: Room temperature Raman spectra with various thermal cycles**

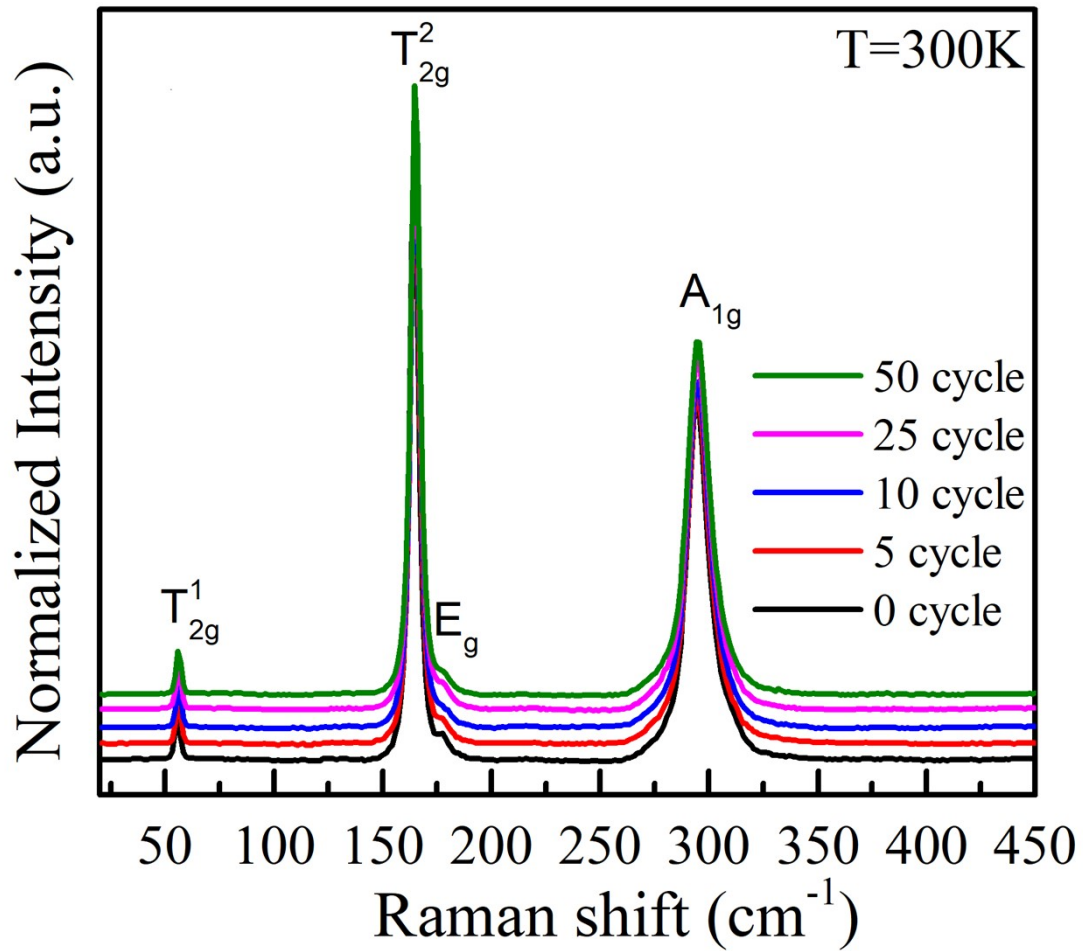

**Fig. S2.** Room temperature Raman spectra show no change in the Raman peak positions after several thermal cycles.

### S3: Room temperature diffuse reflectance spectra with various thermal cycles

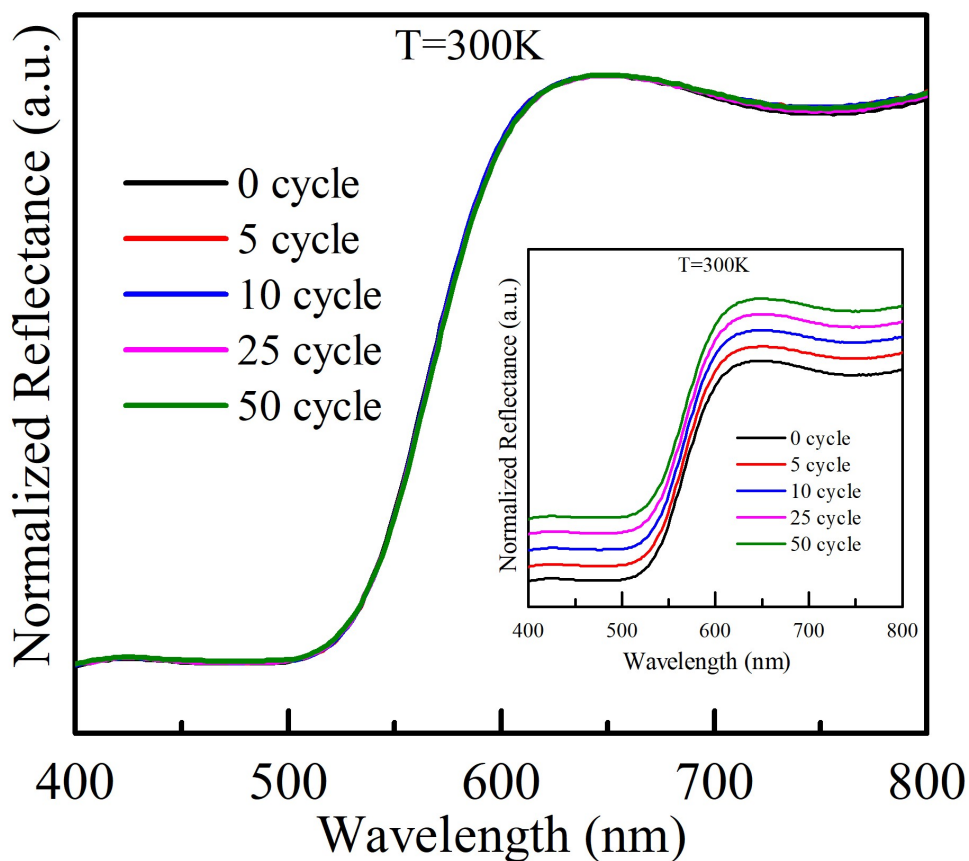

**Fig. S3.** Room temperature UV-vis diffuse reflectance spectra with different thermal cycles depicts that the reflectance spectra remain unchanged. For clarity, the spectra are re-plotted in the inset with a constant upward shift in the y-axis of each spectra.
